## Meta-analysis

## The prevalence of depression in rheumatoid arthritis: a systematic review and meta-analysis

Faith Matcham<sup>1</sup>, Lauren Rayner<sup>1</sup>, Sophia Steer<sup>2</sup> and Matthew Hotopf<sup>1</sup>

## Abstract

**Objective.** There is substantial uncertainty regarding the prevalence of depression in RA. We conducted a systematic review aiming to describe the prevalence of depression in RA.

**Methods.** Web of Science, PsycINFO, CINAHL, Embase, Medline and PubMed were searched for cross-sectional studies reporting a prevalence estimate for depression in adult RA patients. Studies were reviewed in accordance with the Preferred Reporting Items for Systematic reviews and Meta-Analyses (PRISMA) guidelines and a meta-analysis was performed.

**Results.** A total of 72 studies, including 13 189 patients, were eligible for inclusion in the review. Forty-three methods of defining depression were reported. Meta-analyses revealed the prevalence of major depressive disorder to be 16.8% (95% CI 10%, 24%). According to the PHQ-9, the prevalence of depression was 38.8% (95% CI 34%, 43%), and prevalence levels according to the HADS with thresholds of 8 and 11 were 34.2% (95% CI 25%, 44%) and 14.8% (95% CI 12%, 18%), respectively. The main influence on depression prevalence was the mean age of the sample.

**Conclusion.** Depression is highly prevalent in RA and associated with poorer RA outcomes. This suggests that optimal care of RA patients may include the detection and management of depression.

**Key words:** depression, rheumatoid arthritis, prevalence, meta-analysis, systematic review.

## Introduction

Depression is more common in RA than in the general population [1] and has been associated with increased pain [2], fatigue [3], reduced health-related quality of life [4], increased levels of physical disability [5] and increased health care costs [6]. Depressed RA patients have poorer long-term outcomes, including increased pain [7], more comorbidities [8] and increased mortality levels [9]. Depression may therefore be a useful target for interventions aimed at improving subjective health and quality of life in RA patients. However, prevalence estimates for depression in RA range between 9.5% [10] and 41.5% [11], making it difficult to establish the likely impact of depression in this patient group.

There are various reasons why this variation in prevalence estimates may exist. First, the term depression is not clear-cut. Making sense of depressive symptoms in the context of chronic physical disease is challenging—it may be difficult to distinguish between patients with a depressive disorder, as opposed to those demonstrating a normal reaction to living with a chronic, debilitating condition. Further, a number of somatic symptoms of depression (e.g. fatigue, poor sleep and loss of appetite) might be expected to occur in RA as part of the disease process. To overcome this, researchers have adapted diagnostic thresholds to define caseness [12] or removed items that may be confounded by RA symptoms, for example, items assessing fatigue or sleep quality [13]. Such variations in definitions of depression may influence prevalence estimates.

Second, there are a multitude of methods available to detect depression. The gold standard method is psychiatric interview and diagnosis according to Diagnostic and Statistical Manual (DSM) [14] or International Classification of Diseases (ICD) [15] criteria. However, such interviews are time consuming and expensive and therefore often not ideal for examining patients in a busy hospital environment [16]. Alternatively, self-report screening

<sup>1</sup>Department of Psychological Medicine, Institute of Psychiatry, King's College London, London, UK and <sup>2</sup>Department of Academic Rheumatology, King's College Hospital, London, UK.

Submitted 28 September 2012; revised version accepted 21 March 2013.

Correspondence to: Faith Matcham, Department of Psychological Medicine, Institute of Psychiatry, King's College London, Weston Education Centre, 10 Cutcombe Road, London SE5 9RJ, UK.  
E-mail: faith.matcham@kcl.ac.uk

questionnaires, such as the Patient Health Questionnaire (PHQ) [17] and the Hospital Anxiety and Depression Scale (HADS), may be used. These self-report tools are quick and easy to complete, meaning they are often preferred by researchers attempting to collect a large amount of data from a large sample; they are also cheaper to use than diagnostic interviews. Prevalence estimates according to screening tools are often based on predefined thresholds, which may result in overestimations of prevalence, as screening questionnaires tend to prioritize sensitivity over specificity [16].

Study quality may be a further explanation for the variance in prevalence estimates. Small studies lead to variable and imprecise prevalence estimates. Sampling strategies may influence prevalence estimates, with studies using convenience sampling or low participation rates giving unrepresentative samples that may be healthier than the target population [18]. Furthermore, the population studied can impact prevalence estimates; some studies may include patients with specific disease durations, or those using a particular type of medication, which may impact prevalence levels [19, 20].

There has only been one previous systematic review of depression in RA, which examined the strength of the association between depression and RA [21]. As yet no systematic review has provided pooled prevalence estimates of depression in RA. The present study aims to fill this gap. We aimed (i) to present a pooled prevalence level of depression in RA patients; (ii) to provide a summary of the methods used to define depression in RA and (iii) to explore the impact of study characteristics on prevalence estimates.

## Materials and methods

### Search strategy and selection criteria

The systematic review protocol and data extraction forms were designed in accordance with the Preferred Reporting Items for Systematic reviews and Meta-Analyses (PRISMA; [22]) by F.M. and L.R. F.M. conducted a systematic search of Web of Science, CINAHL, PsycINFO, Medline, Embase and PubMed, from inception to October 2012. Sample search terms can be found in supplementary Appendix S1, available at *Rheumatology* Online.

### Inclusion and exclusion criteria

Studies met the following inclusion criteria: (i) Cross-sectional design, baseline cross-sectional data from a longitudinal study or baseline cross-sectional data from a trial, before group allocation. (ii) Reported a prevalence level for depression using diagnostic criteria, a research diagnostic tool or a validated screening tool (Table 1). (iii) Reported prevalence level as the number of participants meeting predefined criteria for depression, or a percentage from which the number of participants meeting criteria for depression could be calculated. (iv) The sample size was  $\geq 50$ .

Studies were excluded if they: (i) used a selective sample (e.g. intervention trials after group allocation);

(ii) used a paediatric sample; (iii) retrospectively reviewed medical records to establish depressive symptomatology.

For the meta-analysis, studies using a screening tool without stating the cut-off threshold used to detect depression were excluded. Table 2 provides a full list of the eligible methods of detecting depression, alongside the numbers of articles utilizing each method and the number of participants assessed.

### Data extraction and quality assessment

F.M. conducted the primary data extraction. All articles were examined independently by a second reviewer (L.R.). Inter-rater disagreement was minimal, and any disagreements were resolved through discussion and reexamination of the article in consultation with M.H. When multiple publications spanned the years of longitudinal studies, baseline prevalence levels were reported. A 10-point quality assessment tool (supplementary Appendix S2, available at *Rheumatology* Online) was devised to assess sampling method, sample size, participation rate, criteria used to determine depression and the eligibility criteria for participation in the studies. Articles were scored as follows: 0–3 = low quality; 4–6 = low to medium quality; 7–8 = medium to high quality; 9–10 = high quality.

### Outcome measures

Outcomes were major depression, minor depression, depressive/mood/affective disorder, dysthymic disorder or adjustment disorder, defined by diagnostic interview or according to a defined threshold on a screening tool.

### Statistical analyses

Data were pooled according to diagnosis of depression or screening tool and threshold used to detect caseness. Heterogeneity was found to be moderately high between studies, and therefore random-effects meta-analyses with 95% CIs were conducted with STATA (version 10.0). Heterogeneity was assessed using  $I^2$ , with thresholds of  $\geq 25\%$ ,  $\geq 50\%$  and  $\geq 75\%$  indicating low, moderate and high heterogeneity, respectively [23].

Sensitivity analyses explored whether prevalence estimates were influenced by study design. Planned sensitivity analyses included the following: exclusion of studies with a participation rate  $\leq 75\%$ , or non-reported participation rate; exclusion of studies not stating a sampling strategy, or using a convenience/non-randomized sampling strategy; exclusion of studies that did not state eligibility criteria for inclusion in the study and exclusion of studies using subsets of patients (for example, a female-only sample or patients with limited disease duration). Subgroup analyses were planned by overall study quality, sample size, country of origin and publication year, if there was more than one study in the subgroup. Spearman's correlation analyses with adjusted  $r^2$  assessed the impact of study variables on prevalence estimates. Funnel plots were produced to explore the possibility of publication bias due to preferential publication of small studies reporting high prevalence estimates; Begg-Mazumdar and Egger's tests of publication bias were also performed.

TABLE 1 Overview of prevalence studies of mood in RA patients

| Study ID          | Sampling method <sup>a</sup> | Quality <sup>b</sup> | Sample size | Mean age (s.d.), years | Setting <sup>c</sup> | Criteria for detection of depression (threshold) | Women, % | Country   | Prevalence, %                                                                                                   |
|-------------------|------------------------------|----------------------|-------------|------------------------|----------------------|--------------------------------------------------|----------|-----------|-----------------------------------------------------------------------------------------------------------------|
| Abdel-Nasser 1998 | 1                            | 8                    | 60          | 39.7 (10.9)            | 1                    | DSM-III-R                                        | 80.0     | Egypt     | 23.3                                                                                                            |
| Alishiri 2008     | 1                            | 5                    | 411         | 46.8 (12)              | 1                    | HADS (9)                                         | 87.3     | Iran      | 23.4                                                                                                            |
| Azad 2008         | 0                            | 0                    | 86          | NS                     | 1                    | HADS (9)                                         | NS       | Pakistan  | 55.8                                                                                                            |
| Barlow 1999       | 1                            | 3                    | 102         | 56.3                   | 1                    | HADS (8/11)                                      | 82.4     | UK        | HADS ≥ 8:28.4,<br>HADS ≥ 11:14.7                                                                                |
| Bartlett 2003     | 1                            | 5                    | 77          | 57.5                   | 5                    | CESD (9)                                         | 80.5     | USA       | 31.2                                                                                                            |
| Chandarana 1987   | 1                            | 4                    | 86          | 56.0                   | 1                    | HADS (9)                                         | 74.0     | Canada    | 19.0                                                                                                            |
| Chaney 1996       | 1                            | 6                    | 58          | 52.0 (12.5)            | 1                    | IDD for DSM-IV                                   | 81.0     | USA       | 14.0                                                                                                            |
| Chang 2007        | 0                            | 2                    | 509         | 52.0                   | NS                   | HADS (8/11/15)                                   | 73.0     | USA       | HADS ≥ 8:40.7,<br>HADS ≥ 11:18.5,<br>HADS ≥ 15:4.5                                                              |
| Chow 2001         | 0                            | 0                    | 93          | 49.6 (12.3)            | 1                    | HADS (11)                                        | 87.0     | Malaysia  | 17.2                                                                                                            |
| Covic 2006        | 0                            | 0                    | 134         | 57.9 (12.2)            | 1                    | CESD (16)                                        | 77.0     | Australia | 40.0                                                                                                            |
| Covic 2009        | 0                            | 0                    | 92          | 56.3 (13.7)            | 1                    | HADS (8/11)<br>CESD (16/19)<br>CESD 13 (9/13)    | 62.0     | UK        | HADS ≥ 8:22.6,<br>HADS ≥ 11:9.7,<br>CESD ≥ 16:45.3,<br>CESD ≥ 19:35.9,<br>CESD-13 ≥ 9:26.6,<br>CESD-13 ≥ 13:8.1 |
| Cunningham 2003   | 0                            | 1                    | 141         | 59.6 (10.3)            | NS                   | CESD (12)                                        | 100.0    | USA       | 13.0                                                                                                            |
| Dirik 2010        | 0                            | 4                    | 117         | 48.5 (13.2)            | 4                    | HADS (8)                                         | 84.6     | Turkey    | 55.6                                                                                                            |
| El-Miedany 2002   | 1                            | 5                    | 80          | 41.9 (8.4)             | 1                    | ICD-10                                           | 88.7     | Egypt     | 66.3                                                                                                            |
| Escalante 2000    | 1                            | 6                    | 236         | 55.2                   | 1                    | CESD (16)                                        | 62.0     | USA       | 42.0                                                                                                            |
| Fifield 1992      | 1                            | 4                    | 988         | 51.0 (10.0)            | 1                    | CESD (16)                                        | 78.0     | USA       | 32.0                                                                                                            |
| Frank 1988        | 1                            | 5                    | 137         | 58.3 (9.6)             | 5                    | DIS for DSM-III                                  | 24.1     | USA       | MDD: 17,<br>dysthymia: 40.7                                                                                     |
| Frank 1991        | 1                            | 5                    | 74          | 55.8                   | 1                    | IDD for DSM-III                                  | NS       | USA       | DSM-III: 27,<br>DSM-III-R: 16.2                                                                                 |
| Goodenow 1990     | 1                            | 6                    | 194         | 50.7                   | 1                    | CESD (16)                                        | 100.0    | USA       | 22.7                                                                                                            |
| Hagglund 1989     | 1                            | 6                    | 52          | 56.5 (11.9)            | 1                    | BDI (10/19/30)                                   | 61.5     | USA       | BDI ≥ 10:35,<br>BDI ≥ 19:23,<br>BDI ≥ 30:20                                                                     |
| Hanly 2005        | 1                            | 2                    | 53          | 52.0                   | 1                    | HADS (11)                                        | 84.9     | Canada    | 0.04                                                                                                            |
| Hewlett 1995      | 0                            | 0                    | 50          | 58.0                   | 1                    | HADS (8/10)                                      | 74.0     | UK        | HADS ≥ 8:20<br>HADS ≥ 10:00                                                                                     |
| Hewlett 2002      | 1                            | 5                    | 93          | 60.0 (10.8)            | 1                    | HADS (11)                                        | 64.5     | UK        | 20.4                                                                                                            |
| Hider 2009        | 1                            | 7                    | 159         | 56.4 (12.2)            | 1                    | HADS (8)                                         | 72.0     | UK        | 47.5                                                                                                            |

(continued)

TABLE 1 Continued

| Study ID                 | Sampling method <sup>a</sup> | Quality <sup>b</sup> | Sample size | Mean age (s.d.), years | Setting <sup>c</sup> | Criteria for detection of depression (threshold) | Women, % | Country         | Prevalence, %                                                                                                     |
|--------------------------|------------------------------|----------------------|-------------|------------------------|----------------------|--------------------------------------------------|----------|-----------------|-------------------------------------------------------------------------------------------------------------------|
| Ho 2011                  | 1                            | 6                    | 100         | 53.7 (13.6)            | 1                    | HADS (11)                                        | 75       | Singapore       | 15.0                                                                                                              |
| Ichikawa 1995            | 0                            | 0                    | 92          | 53.4 (13.3)            | 1                    | SRS (40)                                         | 82.6     | Japan           | 48.9                                                                                                              |
| Iriarte 2000             | 1                            | 4                    | 164         | 52.0 (12.8)            | 1                    | SRS (48)                                         | 74       | Spain           | 38.0                                                                                                              |
| Isik 2007                | 1                            | 4                    | 82          | 52.3 (11.9)            | NS                   | DSM-IV                                           | 84.1     | Turkey          | 41.5                                                                                                              |
| Jacobi 2001              | 0                            | 5                    | 725         | 59.0 (14.2)            | 5                    | CESD (17)                                        | 71       | The Netherlands | 20.3                                                                                                              |
| Karasu 2002              | 0                            | 0                    | 71          | 52.8                   | 4                    | BDI (not stated)                                 | 70.4     | Turkey          | 33.8                                                                                                              |
| Karpouzas 2010           | 1                            | 4                    | 193         | NS                     | NS                   | PHQ-9 (10)                                       | NS       | USA             | 36.0                                                                                                              |
| Kasle 2008               | 0                            | 1                    | 148         | 56.6 (12.3)            | 1                    | CESD (27)                                        | 77       | USA             | 7.43                                                                                                              |
| Katz 1994                | 1                            | 6                    | 726         | 60.4                   | 1                    | S-GDS (7)                                        | 77       | USA             | 14.0                                                                                                              |
| Kobayashi-Gutierrez 2009 | 1                            | 3                    | 79          | NS                     | 1                    | CESD (16)                                        | NS       | Mexico          | 26.6                                                                                                              |
| Krug 1997                | 1                            | 3                    | 77          | 58.2 (11.4)            | 1                    | BDI (10)                                         | 22.0     | USA             | 35.0                                                                                                              |
| Lindroth 1994            | 1                            | 6                    | 78          | 62.0                   | 1                    | HADS (10)                                        | 83.3     | Sweden          | 25.6                                                                                                              |
| Lok 2010                 | 1                            | 9                    | 200         | 51.4 (10.5)            | 1                    | SCID for DSM-IV                                  | 79.0     | Hong Kong       | Major depression: 9.5, depressive disorder: 1.5, dysthymic disorder: 3.5, adjustment disorder and depression: 0.5 |
| Mackinnon 1998           | 0                            | 4                    | 143         | 49.6 (11.2)            | 1                    | CESD (16)                                        | 74.8     | Canada          | 28.7                                                                                                              |
| Margaretten 2011         | 1                            | 5                    | 466         | 54.0 (14.0)            | 1                    | PHQ-9 (10)                                       | 85.0     | USA             | 37.0                                                                                                              |
| Massardo 2001            | 0                            | 2                    | 75          | Median: 53.0           | 1                    | CESD (16)                                        | 93.3     | Chile           | 47.0                                                                                                              |
| Mella 2010               | 1                            | 3                    | 62          | 51.1 (12.8)            | 1                    | HADS (7)                                         | 83.9     | Brazil          | 53.2                                                                                                              |
| Mikulis 2003             | 1                            | 5                    | 98          | 74.6 (3.8)             | 2                    | GDS-5 (2)                                        | 100.0    | USA             | 24.5                                                                                                              |
| Mo 2010                  | 1                            | 5                    | 97          | NS                     | 1                    | HADS (11)                                        | NS       | UK              | 2.9                                                                                                               |
| Murphy 1988              | 1                            | 5                    | 80          | Median: 62.0           | 4                    | PAS for DSM-III                                  | 80.0     | UK              | 12.5                                                                                                              |
| Murphy 1999              | 1                            | 6                    | 62          | Median: 59.5           | 1                    | HADS (10)                                        | 83.9     | UK              | 17.0                                                                                                              |
| Nas 2011                 | 1                            | 5                    | 421         | 50.1                   | 1                    | HADS (7)                                         | 82.9     | Turkey          | 75.0                                                                                                              |
| Pastor-Oliver 1998       | 0                            | 2                    | 221         | 55.4 (12.4)            | 5                    | SRS (48)                                         | 84.2     | Spain           | 33.5                                                                                                              |
| Penninx 1996             | 1                            | 6                    | 210         | NS                     | 2                    | CESD (16)                                        | NS       | The Netherlands | 41.4                                                                                                              |
| Piergiacomi 1989         | 1                            | 3                    | 50          | 51.4 (13.5)            | 1                    | CESD (19)                                        | 74.0     | Italy           | 42.0                                                                                                              |
| Pincus 1996              | 0                            | 4                    | 163         | 61.2 (13.7)            | 1                    | HADS (8/11)                                      | 72.0     | UK              | HADS ≥ 8:23<br>HADS ≥ 11:15                                                                                       |
| Pinheiro 2010            | 0                            | 2                    | 501         | 51.0                   | 1                    | HADS (11)                                        | NS       | Brazil          | 20.6                                                                                                              |
| Plach 2003               | 0                            | 1                    | 156         | 59.0 (11)              | 5                    | CESD (15)                                        | 100.0    | USA             | 35.0                                                                                                              |
| Raspe 1987               | 0                            | 0                    | 75          | 49.0                   | NS                   | BDI-SF (8)                                       | 79.0     | Germany         | 22.0                                                                                                              |
| Revenson 1991            | 0                            | 3                    | 101         | 51.0                   | 1                    | CESD (16)                                        | 82.0     | USA             | 36.0                                                                                                              |
| Rivero-Carrera 2011      | 0                            | 0                    | 113         | 51.0                   | 1                    | CESD (16)                                        | 89.4     | Venezuela       | 29.0                                                                                                              |

(continued)

TABLE 1 Continued

| Study ID                 | Sampling method <sup>a</sup> | Quality <sup>b</sup> | Sample size | Mean age (s.d.), years | Setting <sup>c</sup> | Criteria for detection of depression (threshold) | Women, % | Country         | Prevalence, %                              |
|--------------------------|------------------------------|----------------------|-------------|------------------------|----------------------|--------------------------------------------------|----------|-----------------|--------------------------------------------|
| Scott 2007               | 0                            | 2                    | 534         | NS                     | 1                    | HADS (11)                                        | NS       | UK              | 18.0                                       |
| Sharpe 2001              | 1                            | 6                    | 53          | 55.1 (14.1)            | 1                    | HADS (7)                                         | 70.0     | Australia       | 15.0                                       |
| Sinclair 2010            | 0                            | 2                    | 125         | 57.8 (15.4)            | 3                    | CESD (23)                                        | 73.6     | USA             | 16.0                                       |
| Smarr 2000               | 1                            | 5                    | 426         | Median: 62.0           | 1                    | CESD (10)                                        | 57.0     | USA             | 29.8                                       |
| Spicer 1998              | 1                            | 4                    | 461         | 60.8 (13.3)            | 3                    | GDS (5/10)                                       | 81.0     | USA             | GDS ≥ 5:11<br>GDS ≥ 10:2                   |
| Takeda 2000              | 0                            | 4                    | 85          | 56.0 (11.6)            | 1                    | SRS (40)                                         | 100.0    | Japan           | 56.5                                       |
| Taylor-Gjervre 2011      | 1                            | 2                    | 145         | 54.2 (15.7)            | 1                    | CESD (15)                                        | 78.0     | Canada          | 37.2                                       |
| Tomasevic-Todorovic 2011 | 0                            | 1                    | 60          | 49.9 (7.6)             | 1                    | BDI (16)                                         | 88.3     | Serbia          | 63.33                                      |
| Tretharne 2005           | 1                            | 3                    | 154         | 56.3 (15.1)            | 1                    | HADS (10)                                        | 73.0     | UK              | 16.0                                       |
| Uguz 2009                | 1                            | 5                    | 83          | 49.9 (13.1)            | 1                    | SCID for DSM-IV                                  | 89.2     | Turkey          | Major depression: 21.8,<br>dysthymia: 13.3 |
| van Hoogmoed 2010        | 0                            | 4                    | 228         | 55.9 (10.8)            | 1                    | BDI-pc (4)                                       | 63.0     | The Netherlands | 7.0                                        |
| Wilkins 2000             | 0                            | 0                    | 96          | 52.7                   | 1                    | CESD (16)                                        | 87.1     | USA             | 60.0                                       |
| Worral 2007              | 1                            | 2                    | 19          | Median: 60.0           | 1                    | HADS (11)                                        | 77.0     | UK              | 11.5                                       |
| Wright 1996              | 0                            | 3                    | 141         | 57.8                   | 1                    | CESD (16)                                        | 45.0     | USA             | 29.8                                       |
| Wright 1998              | 0                            | 3                    | 495         | 60.0                   | 5                    | CESD (16)                                        | 59.6     | USA             | 30.3                                       |
| Zamani 2010              | 0                            | 0                    | 18          | NS                     | 1                    | BDI (not stated)                                 | NS       | Iran            | 22.2                                       |
| Zaphiropoulos 1974       | 1                            | 2                    | 50          | 53.7                   | 4                    | BDI (15)                                         | 72.0     | UK              | 46.0                                       |

NS: not stated; PAS: Psychiatric Assessment Schedule; SCID: Structured Clinical Interview for DSM; DIS: Diagnostic Interview Schedule. <sup>a</sup>0: convenience/non-randomized, or undefined sampling strategy, 1: consecutive/randomized sampling strategy. <sup>b</sup>Quality rated out of 10: 0-3: low quality; 4-6: medium quality; 7-8: medium-high quality; 9-10: high quality. <sup>c</sup>1: outpatient, 2: database, 3: panel from longitudinal study, 4: inpatient/outpatient, 5: outpatient/community.

**TABLE 2** Methods of detecting depression and summary of prevalence and heterogeneity findings

| Tool                                                       | Definition/threshold               | No. of studies | No. of participants | Prevalence, % (95% CI) | Heterogeneity $I^2$ , % |
|------------------------------------------------------------|------------------------------------|----------------|---------------------|------------------------|-------------------------|
| Diagnostic criteria                                        |                                    |                |                     |                        |                         |
| DSM                                                        |                                    |                |                     |                        |                         |
|                                                            | Major depression                   | 4              | 480                 | 16.8 (10, 24)          | 73.4                    |
|                                                            | Dysthymic disorder                 | 3              | 420                 | 18.7 (–2, 39)          | 97.2                    |
|                                                            | Unspecified depression             | 2              | 280                 | 6.4 (–4, 17)           | 88.1                    |
|                                                            | Depressive disorder                | 1              | 200                 | 1.5                    | –                       |
|                                                            | Adjustment disorder and depression | 1              | 200                 | 0.5                    | –                       |
| ICD-10                                                     |                                    |                |                     |                        |                         |
|                                                            | Unspecified depression             | 1              | 80                  | 66.3                   | –                       |
| Screening questionnaires                                   |                                    |                |                     |                        |                         |
| Beck Depression Inventory (BDI)                            |                                    |                |                     |                        |                         |
|                                                            | 10                                 | 2              | 129                 | 34.9 (27, 43)          | 0.0                     |
|                                                            | 15                                 | 1              | 50                  | 46.0                   | –                       |
|                                                            | 16                                 | 1              | 60                  | 63.3                   | –                       |
|                                                            | 19                                 | 1              | 52                  | 23.0                   | –                       |
|                                                            | 30                                 | 1              | 52                  | 2.0                    | –                       |
| BDI-SF <sup>a</sup>                                        |                                    |                |                     |                        |                         |
|                                                            | 8                                  | 1              | 75                  | 22.0                   | –                       |
| BDI-pc <sup>b</sup>                                        |                                    |                |                     |                        |                         |
|                                                            | 4                                  | 1              | 228                 | 7.0                    | –                       |
| Centre for Epidemiological Studies Depression Scale (CESD) |                                    |                |                     |                        |                         |
|                                                            | 9                                  | 1              | 77                  | 31.2                   | –                       |
|                                                            | 10                                 | 1              | 426                 | 29.8                   | –                       |
|                                                            | 12                                 | 1              | 141                 | 13.0                   | –                       |
|                                                            | 15                                 | 2              | 301                 | 36.2 (31, 42)          | 0.0                     |
|                                                            | 16                                 | 14             | 3333                | 36.0 (32, 40)          | 83.1                    |
|                                                            | 17                                 | 1              | 725                 | 20.3                   | –                       |
|                                                            | 19                                 | 2              | 142                 | 37.9 (30, 46)          | 0.0                     |
|                                                            | 23                                 | 1              | 125                 | 16.0                   | –                       |
|                                                            | 27                                 | 1              | 148                 | 7.4                    | –                       |
| CESD-13 <sup>c</sup>                                       |                                    |                |                     |                        |                         |
|                                                            | 9                                  | 1              | 92                  | 26.6                   | –                       |
|                                                            | 13                                 | 1              | 92                  | 8.1                    | –                       |
| Geriatric Depression Scale (GDS)                           |                                    |                |                     |                        |                         |
|                                                            | 5                                  | 1              | 461                 | 2.0                    | –                       |
|                                                            | 10                                 | 1              | 461                 | 11.0                   | –                       |
| S-GDS <sup>d</sup>                                         |                                    |                |                     |                        |                         |
|                                                            | 7                                  | 1              | 726                 | 14.0                   | –                       |
| GDS-5 <sup>e</sup>                                         |                                    |                |                     |                        |                         |
|                                                            | 2                                  | 1              | 98                  | 24.5                   | –                       |
| Hospital Anxiety and Depression Scale (HADS)               |                                    |                |                     |                        |                         |
|                                                            | 7                                  | 3              | 536                 | 48.0 (9, 87)           | 98.5                    |
|                                                            | 8                                  | 7              | 1193                | 34.2 (25, 44)          | 90.9                    |
|                                                            | 9                                  | 3              | 583                 | 32.1 (14, 50)          | 94.4                    |
|                                                            | 10                                 | 4              | 344                 | 14.9 (4, 26)           | 90.9                    |
|                                                            | 11                                 | 12             | 2398                | 14.8 (12, 18)          | 74.0                    |
|                                                            | 15                                 | 1              | 509                 | 4.5                    | –                       |
| Inventory to Diagnose Depression (IDD)                     |                                    |                |                     |                        |                         |
|                                                            | DSM-III                            | 1              | 74                  | 27.0                   | –                       |
|                                                            | DSM-III-R                          | 1              | 74                  | 16.2                   | –                       |
|                                                            | DSM-IV                             | 1              | 58                  | 14.0                   | –                       |
| Patient Health Questionnaire (PHQ-9)                       |                                    |                |                     |                        |                         |
|                                                            | 10                                 | 2              | 659                 | 38.8 (34, 43)          | 19.8                    |
| Self-Rating Scale (SRS)                                    |                                    |                |                     |                        |                         |
|                                                            | 40                                 | 2              | 726                 | 52.6 (52, 60)          | 1.8                     |
|                                                            | 48                                 | 2              | 98                  | 35.3 (31, 40)          | 0.0                     |

<sup>a</sup>BDI Short Form; <sup>b</sup>BDI for Primary Care; <sup>c</sup>13-item CES-D; <sup>d</sup>Short GDS; <sup>e</sup>5-item GDS.

## Results

### Search results

The search yielded 28 328 relevant articles (Fig. 1). After removal of duplicates, titles and then abstracts were screened for potential eligibility. All non-RA articles were removed, resulting in 806 potentially eligible studies. These were screened according to the inclusion and exclusion criteria for entry into the study, resulting in a

total of 101 eligible studies. After taking into account multiple publications from the same sample, 72 articles were included in the review.

### Included studies

Table 1 presents the 72 papers included in the review (see supplementary Appendix S3, available at *Rheumatology* Online). Seven studies used diagnostic criteria (DSM or ICD), and the remaining 66 used (one or more) screening

Fig. 1 Search results and study selection.

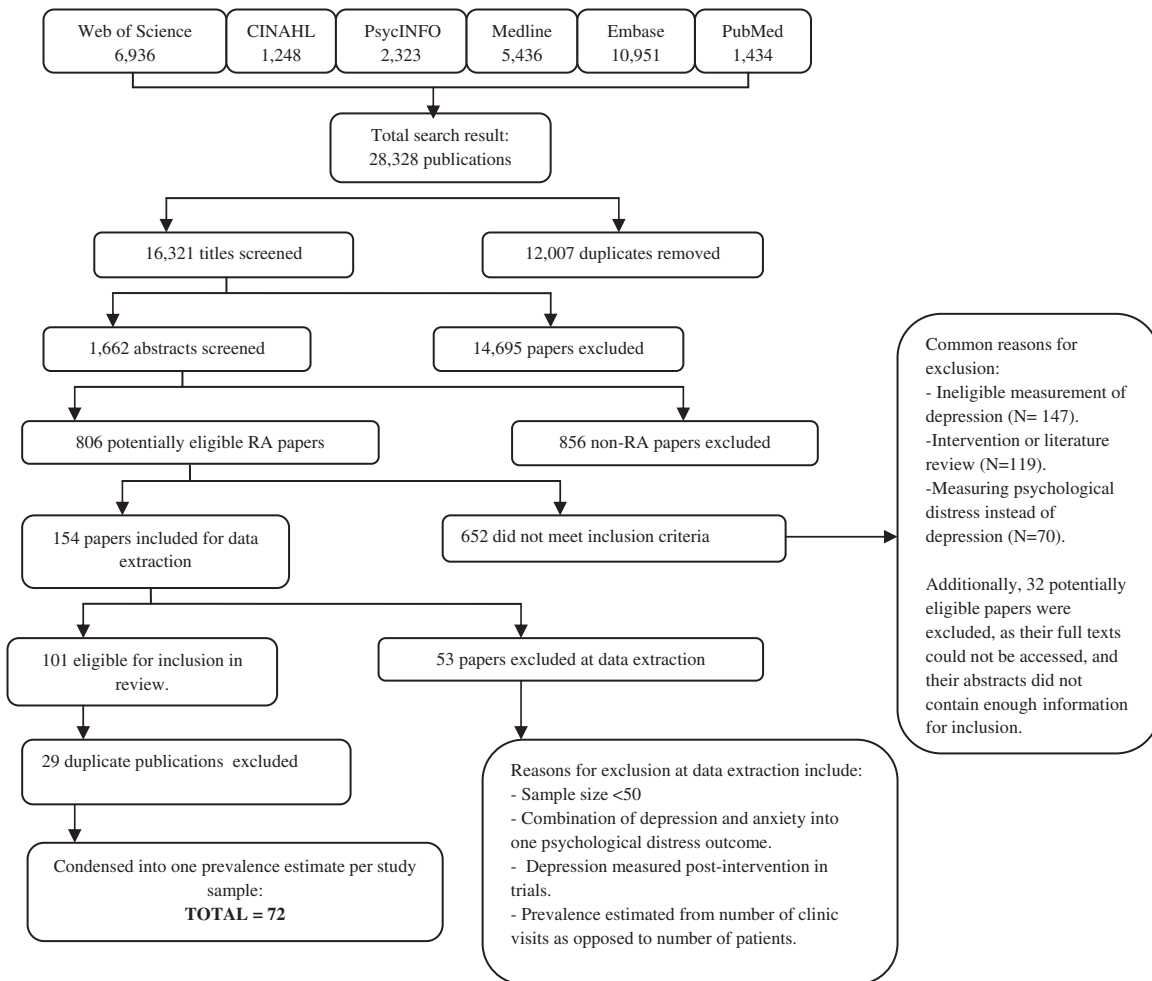

tools to detect depression (PHQ-9, IDD, HADS, CESD, BDI, SDS or GDS), the most popular being the HADS and the CESD. The studies represented a total of 13 189 patients with RA; the median of mean ages was 53.7 years [interquartile range (IQR) 51.0–56.5], and the median percentage of females represented in the sample was 77.0% (IQR 70.4–82.9%). Sample sizes ranged from 50 to 988 participants (median = 96.0; IQR 75.0–159.0).

#### Quality assessment

Table 1 presents the quality assessments for the 72 papers, according to the quality assessment tool (supplementary Appendix S2, available at *Rheumatology* Online). The overall quality of the articles was poor with a median quality score of 3/10 (IQR 1–5). Eleven papers (15%) scored 0/10, and 82% of papers scored 5/10 or lower. No papers achieved the maximum score of 10; however, one received 9 out of 10 [10]. Specifically, 16.6% of studies had a sample size larger than 300, only 41.7% stated a participation rate and of these, only 40% had a

participation rate  $\geq 75\%$ . Only 55.6% reported participant eligibility criteria for entry into the study.

#### Defining depression

Depression was defined in 40 different ways (Table 2). The studies using diagnostic interviews reported three different subtypes of depression: major depressive disorder (MDD), minor depression (MD) and dysthymic disorder (DD), as well as combinations of disorders (depression with adjustment disorders or anxiety) and unspecified depression. Studies using screening questionnaires defined possible or probable caseness using multiple thresholds or detected any depression using one threshold. According to diagnostic criteria, MDD and DD were the most commonly diagnosed depressive subtypes. A full explanation of the differences between depressive diagnoses can be found in supplementary Appendix S4, available at *Rheumatology* Online.

The most commonly used screening questionnaire was the HADS, with 30 studies using this screening tool. However, six different thresholds were presented in the

Fig. 2 Prevalence of MDD in RA.

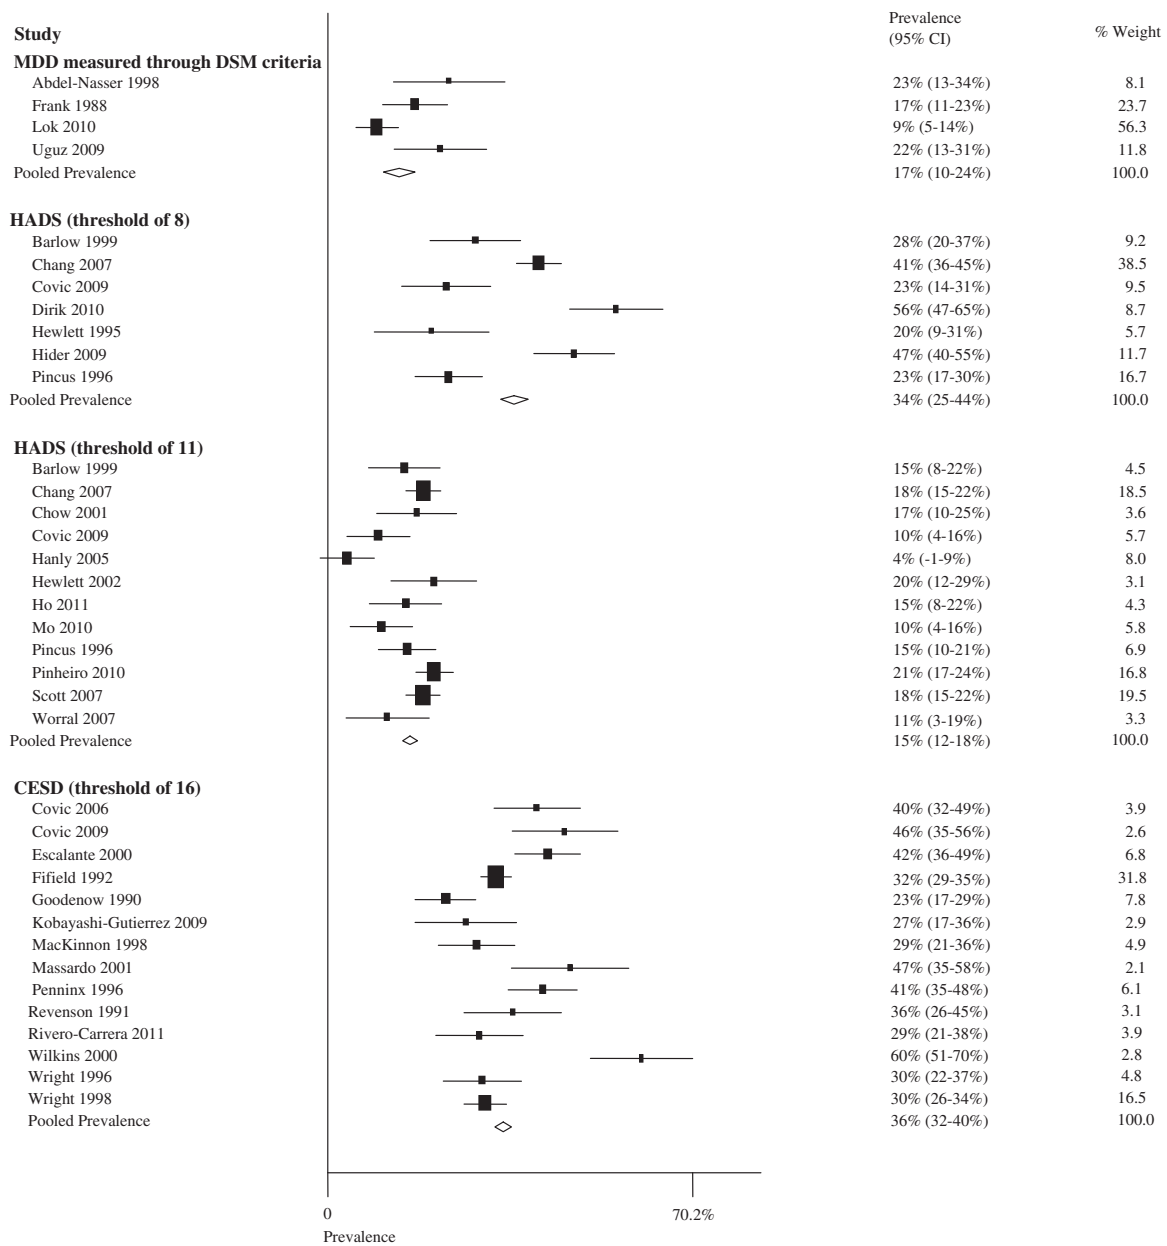

Pooled prevalence of MDD according to DSM criteria in RA patients by random effects meta-analysis.

articles, with the conventional cut-offs of 8 (probable depression) and 11 (definite depression) being the most commonly used. Twenty-five articles used the CESD; nine different cut-off points were presented, the most commonly used being 16. Eight papers used the BDI, with five different thresholds for depression.

Prevalence of depression

Prevalence of depression alone (excluding combination disorders) ranged between 0.04% and 66.3% in individual studies (Table 1). Table 2 presents the summary of meta-analyses and heterogeneity assessments.

Meta-analytical pooled prevalence of MDD (Fig. 2) according to the DSM diagnostic criteria was 16.8% (95% CI 10.0%, 24.0%), with moderate heterogeneity ( $I^2 = 73.4%$ ). Dysthymic disorder (according to DSM criteria) showed a pooled prevalence level of 18.7% (95% CI -2.0%, 39.0%), with high heterogeneity ( $I^2 = 97.2%$ ).

Prevalence of depression according to the PHQ-9, with a threshold of 10 indicating moderate-severe depressive symptoms, was 38.8% (95% CI 34.0%, 43.0%), with low heterogeneity ( $I^2 = 19.8%$ ).

Analyses of screening questionnaires according to the threshold used to detect depression were conducted. As



expected, higher thresholds yielded lower prevalence estimates. For example, the HADS shows an estimated prevalence of 34.2% when used with a threshold of 8, and a prevalence of 14.8% when used with a threshold of 11 (Fig. 2).

Assessment of publication bias (see supplementary Appendix S5, available at *Rheumatology* Online) indicated significant publication bias, according to the Egger's test, in studies reporting MDD according to DSM criteria [Begg-Mazumdar: Kendall's  $\tau = 1.36$ ,  $P = 0.17$ , Egger: bias = 4.59 (95% CI 1.36%, 7.82%),  $P = 0.03$ ]. There was no significant evidence of publication bias in any other analyses.

### Sensitivity and subgroup analyses

Table 3 shows prevalence estimates according to each sensitivity and subgroup analysis, in comparison with the primary analysis. The results of the sensitivity analyses indicated no particular trend or pattern according to the exclusion of studies with only abstracts available, the exclusion of studies with unreported participation rates or participation rates  $\leq 75\%$ , the removal of studies using convenience, non-randomized, or with unreported sampling strategies, or the exclusion of studies using subsets of patients. Exclusion of studies with no reported eligibility criteria tended to increase prevalence estimates, with the exception of the CESD (threshold 16). The subgroup analyses were conducted according to sample size, overall quality and publication year. The subgroup analyses for sample size and overall quality showed no clear patterns. However, more recent publications tended to yield higher prevalence estimates.

### Associated study variables

Spearman's correlation analyses with adjusted  $r^2$  were used to assess the associations between linear variables including participation rate, sample size, overall study quality, publication year, proportion of female participants, mean age of participants and mean duration of illness. Table 4 shows the results of these analyses.

A significant relationship was found between mean age and prevalence estimate; lower age was associated with increased depression prevalence ( $r = -0.3$ ,  $P = 0.02$ ). No other study characteristics showed a significant association with prevalence estimate.

## Discussion

Depression is highly prevalent in RA patients. Estimates varied according to the way in which depression was measured, but our pooled estimates from the small number of studies using gold standard clinical interviews suggest that major depression is present in 16.8% of RA patients. The larger number of studies using screening tools found significant depressive symptoms present in 38.8% using the PHQ-9 and between 14.8% and 48% using the HADS. These prevalence estimates are considerably higher than those observed in the general population [1] and are similar to, or higher than, those observed

in patients with diabetes [24], Parkinson's disease [25] and cancer [26]. Although studies varied widely in terms of quality (and many were of poor quality), our sensitivity analyses indicate that prevalence estimates were reasonably stable. Apart from the measurement tool used to ascertain depression, study quality and study population had little impact on the estimates detected.

The RA patient population represents a largely female, older adult population [27]. It could be suggested that the inflated levels of depression found in this sample represent the increased risk of depression found in females and the elderly [28, 29], regardless of the presence of RA. However, as we found a significant negative association between age and depression prevalence estimate, it is more likely that our findings represent an increased risk of depression in RA patients in comparison with the general population.

A bewildering diversity of assessment measures were used to ascertain depression. This is similar to the situation in other physical diseases [30]. In this review, we did not include many studies that did not use validated measures of depression or questionnaires that assess a broader overlapping concept of psychological distress. Nevertheless we found that many studies used idiosyncratic cut-off scores on screening tools, meaning that the range of estimates for one such measure (the HADS) varied from 14.8% to 48%. Because there have not been validation studies to determine the best cut-point for such screening tools in this population, one clear recommendation is that investigators justify the use of idiosyncratic thresholds, and always report prevalence at conventional cut-points as well, to allow cross-study comparisons.

We used rigorous methods to conduct the review, with a sensitive search, and a reproducible, structured approach to data extraction and synthesis. We took a broadly inclusive approach to inclusion of studies, preferring to include less rigorous studies and explore the impact of study design in sensitivity analyses than to exclude such studies from the outset. It is possible that publication bias affected our results. We explored this using funnel plots and Egger's test where the assumption made was that small studies reporting low prevalence of depression would be less likely to be published than small studies reporting high prevalence. We only found evidence of potential publication bias in the studies that used diagnostic interviews. This is surprising since the efforts taken to conduct such studies are considerable and we would have anticipated these to be least likely to be affected by publication bias.

There are, however, additional important shortcomings in the evidence on prevalence of depression in RA that need to be addressed. The limited number of studies using structured clinical interview and determining depression according to DSM and ICD criteria is a concern. The high rates of depressive symptomatology detected through the screening tools could be due to the overlap between the somatic symptoms of depression and symptoms of RA. Symptoms frequently associated with

**TABLE 3** Impact of study characteristics on prevalence estimates for depression in RA: sensitivity and subgroup analyses

|                                                                          | Depression definition (threshold)                            |                                                               |                                                              |                                                               |                                                                 |                                                              | CESD (16)                                                      |                                                                |
|--------------------------------------------------------------------------|--------------------------------------------------------------|---------------------------------------------------------------|--------------------------------------------------------------|---------------------------------------------------------------|-----------------------------------------------------------------|--------------------------------------------------------------|----------------------------------------------------------------|----------------------------------------------------------------|
|                                                                          | Major depression (DSM)                                       | Dysthymic disorder (DSM)                                      | HADS (7)                                                     | HADS (8)                                                      | HADS (9)                                                        | HADS (10)                                                    |                                                                |                                                                |
| Primary analysis                                                         | 16.8 (10, 24)<br>$I^2 = 73.4\%$<br>4 studies<br>480 patients | 18.7 (-2, 39)<br>$I^2 = 97.2\%$<br>3 studies<br>420 patients  | 48.0 (9, 87)<br>$I^2 = 98.5\%$<br>3 studies<br>536 patients  | 34.2 (25, 44)<br>$I^2 = 90.9\%$<br>7 studies<br>1193 patients | 32.1 (14, 50)<br>$I^2 = 94.4\%$<br>3 studies<br>583 patients    | 14.9 (4, 26)<br>$I^2 = 90.9\%$<br>4 studies<br>344 patients  | 14.8 (12, 18)<br>$I^2 = 74.0\%$<br>12 studies<br>2398 patients | 36.0 (32, 40)<br>$I^2 = 83.1\%$<br>14 studies<br>3333 patients |
| Sensitivity analyses                                                     |                                                              |                                                               |                                                              |                                                               |                                                                 |                                                              |                                                                |                                                                |
| Excluding studies at high risk of bias                                   | —                                                            | 7.8 (2, 17)<br>$I^2 = 83.7\%$<br>2 studies<br>283 patients    | —                                                            | 35.2 (23, 47)<br>$I^2 = 83.5\%$<br>2 studies<br>611 patients  | 22.4 (18.6, 26.1)<br>$I^2 = 2.8\%$<br>2 studies<br>497 patients | —                                                            | 16.4 (14, 18)<br>$I^2 = 16.2\%$<br>9 studies<br>1752 patients  | 32.9 (30, 38)<br>$I^2 = 51.3\%$<br>8 studies<br>2145 patients  |
| Excluding studies with only abstracts available                          | —                                                            | —                                                             | 65.1 (44, 87)<br>$I^2 = 90.8\%$<br>2 studies<br>483 patients | 33.0 (21, 45)<br>$I^2 = 91.4\%$<br>6 studies<br>684 patients  | —                                                               | —                                                            | 35.4 (31, 40)<br>$I^2 = 83.3\%$<br>13 studies<br>302 patients  |                                                                |
| Excluding studies with unreported PR or PR <75%                          | 15.5 (2, 29)<br>$I^2 = 82.2\%$<br>2 studies<br>260 patients  | —                                                             | —                                                            | 41.9 (22, 62)<br>$I^2 = 95\%$<br>3 studies<br>440 patients    | —                                                               | 21.6 (14, 29)<br>$I^2 = 23.1\%$<br>2 studies<br>140 patients | 37.7 (29, 46)<br>$I^2 = 77.6\%$<br>3 studies<br>589 patients   |                                                                |
| Excluding convenience non-randomized or unreported sampling methods      | 16.8 (10, 24)<br>$I^2 = 73.4\%$<br>4 studies<br>480 patients | 18.7 (2, 39)<br>$I^2 = 97.2\%$<br>3 studies<br>420 patients   | 48.0 (9, 87)<br>$I^2 = 98.5\%$<br>3 studies<br>536 patients  | 38.1 (19, 57)<br>$I^2 = 90.2\%$<br>2 studies<br>262 patients  | —                                                               | 18.9 (14, 24)<br>$I^2 = 25.7\%$<br>3 studies<br>294 patients | 33.2 (26, 40)<br>$I^2 = 85.8\%$<br>5 studies<br>1707 patients  |                                                                |
| Excluding studies with no reported eligibility criteria for participants | 16.8 (10, 24)<br>$I^2 = 73.4\%$<br>4 studies<br>480 patients | 18.7 (2, 39)<br>$I^2 = 97.2\%$<br>3 studies<br>420 patients   | 48.0 (9, 87)<br>$I^2 = 98.5\%$<br>3 studies<br>536 patients  | 43.8 (29, 59)<br>$I^2 = 89.6\%$<br>3 studies<br>379 patients  | 39.2 (7, 71)<br>$I^2 = 96.9\%$<br>2 studies<br>497 patients     | 21.6 (14, 29)<br>$I^2 = 23.1\%$<br>2 studies<br>140 patients | 28.6 (25, 32)<br>$I^2 = 28.5\%$<br>6 studies<br>1153 patients  |                                                                |
| Excluding studies using subsets of patients <sup>a</sup>                 | 16.8 (10, 24)<br>$I^2 = 73.4\%$<br>4 studies<br>480 patients | 18.7 (2, 39)<br>$I^2 = 97.2\%$<br>3 studies<br>420 patients   | —                                                            | 32.6 (21, 45)<br>$I^2 = 92.6\%$<br>5 studies<br>931 patients  | —                                                               | 14.6 (-1, 30)<br>$I^2 = 92.2\%$<br>3 studies<br>190 patients | 37.1 (33, 41)<br>$I^2 = 80.7\%$<br>13 studies<br>2932 patients |                                                                |
| Subgroup analyses                                                        |                                                              |                                                               |                                                              |                                                               |                                                                 |                                                              |                                                                |                                                                |
| Sample size                                                              | 50-149                                                       | 26.6 (0.3, 53)<br>$I^2 = 95.7\%$<br>2 studies<br>220 patients | 34.0 (9, 71)<br>$I^2 = 95.6\%$<br>2 studies<br>115 patients  | 30.0 (15, 46)<br>$I^2 = 92.6\%$<br>4 studies<br>422 patients  | 37.1 (0.6, 74)<br>$I^2 = 96.7\%$<br>2 studies<br>172 patients   | 14.6 (-1, 30)<br>$I^2 = 92.2\%$<br>3 studies<br>190 patients | 37.8 (31, 45)<br>$I^2 = 81.9\%$<br>9 studies<br>974 patients   |                                                                |
|                                                                          | 150-399                                                      | —                                                             | —                                                            | 37.0 (24, 50)<br>$I^2 = 92.6\%$<br>3 studies<br>832 patients  | —                                                               | —                                                            | 35 (23, 48)<br>$I^2 = 92.2\%$<br>3 studies<br>640 patients     |                                                                |
|                                                                          | 400+                                                         | —                                                             | —                                                            | —                                                             | —                                                               | 19.0 (17, 21)<br>$I^2 = 0\%$<br>3 studies<br>1544 patients   | 31.7 (29, 34)<br>$I^2 = 0\%$<br>2 studies<br>1483 patients     |                                                                |

(continued)

TABLE 3 Continued

|                   | Depression definition (threshold) |                                                          |                                                               |                                                             |                                                            |                                                              | CESD (16)                                                   |                                                                              |
|-------------------|-----------------------------------|----------------------------------------------------------|---------------------------------------------------------------|-------------------------------------------------------------|------------------------------------------------------------|--------------------------------------------------------------|-------------------------------------------------------------|------------------------------------------------------------------------------|
|                   | Major depression (DSM)            | Dysthymic disorder (DSM)                                 | HADS (7)                                                      | HADS (8)                                                    | HADS (9)                                                   | HADS (10)                                                    |                                                             | HADS (11)                                                                    |
| Overall quality   | 0-3 (low)                         | —                                                        | —                                                             | 28.6 (18, 39)<br><i>I</i> <sup>2</sup> = 87.3%<br>4 studies | —                                                          | 8.9 (9, 23)<br><i>I</i> <sup>2</sup> = 93.7%<br>2 studies    | 14.6 (12, 19)<br><i>I</i> <sup>2</sup> = 81.4%<br>8 studies | 37.9 (31, 45)<br><i>I</i> <sup>2</sup> = 83.2%<br>8 studies                  |
|                   | 4-6 (medium)                      | 18.4 (13, 24)<br><i>I</i> <sup>2</sup> = 0%<br>2 studies | 45.4 (-14, 104)<br><i>I</i> <sup>2</sup> = 99.2%<br>2 studies | 39.3 (8, 71)<br><i>I</i> <sup>2</sup> = 96.9%<br>2 studies  | 22.4 (19, 26)<br><i>I</i> <sup>2</sup> = 2.8%<br>2 studies | 21.6 (12, 29)<br><i>I</i> <sup>2</sup> = 23.1%<br>2 studies  | 14.7 (11, 19)<br><i>I</i> <sup>2</sup> = 24.2%<br>4 studies | 1326 patients<br>33.5 (27, 40)<br><i>I</i> <sup>2</sup> = 85.7%<br>5 studies |
| Publication year  | 1990s                             | 220 patients                                             | 474 patients                                                  | 280 patients                                                | 497 patients                                               | 140 patients                                                 | 446 patients                                                | 1771 patients                                                                |
|                   | 2000s                             | —                                                        | 65.1 (44, 87)<br><i>I</i> <sup>2</sup> = 90.8%<br>2 studies   | 24.2 (2, 29)<br><i>I</i> <sup>2</sup> = 0%<br>3 studies     | —                                                          | 14.6 (-1, 30)<br><i>I</i> <sup>2</sup> = 92.2%<br>3 studies  | 15.1 (12, 19)<br><i>I</i> <sup>2</sup> = 0%<br>2 studies    | 31.3 (28, 35)<br><i>I</i> <sup>2</sup> = 69%<br>7 studies                    |
|                   | post-2010                         | —                                                        | 483 patients                                                  | 315 patients                                                | 497 patients                                               | 190 patients                                                 | 265 patients                                                | 2272 patients                                                                |
| Country of origin | America                           | —                                                        | 37.3 (25, 49)<br><i>I</i> <sup>2</sup> = 89.4%<br>3 studies   | 761 patients                                                | —                                                          | —                                                            | 14.2 (10, 19)<br><i>I</i> <sup>2</sup> = 81.2%<br>7 studies | 43.5 (35, 52)<br><i>I</i> <sup>2</sup> = 79.3%<br>6 studies                  |
|                   | UK                                | —                                                        | —                                                             | —                                                           | —                                                          | —                                                            | 15.7 (9, 22)<br><i>I</i> <sup>2</sup> = 77.2%<br>3 studies  | 712 patients                                                                 |
|                   | Asia                              | —                                                        | —                                                             | —                                                           | —                                                          | —                                                            | 698 patients                                                | —                                                                            |
|                   |                                   | —                                                        | —                                                             | —                                                           | —                                                          | —                                                            | —                                                           | 35.5 (29, 42)<br><i>I</i> <sup>2</sup> = 88.7%<br>7 studies                  |
|                   |                                   | —                                                        | —                                                             | —                                                           | —                                                          | —                                                            | —                                                           | 2251 patients                                                                |
|                   |                                   | —                                                        | —                                                             | 28.6 (19, 39)<br><i>I</i> <sup>2</sup> = 86.4%<br>5 studies | —                                                          | 11.5 (0.3, 23)<br><i>I</i> <sup>2</sup> = 90.4%<br>3 studies | 14.6 (11, 18)<br><i>I</i> <sup>2</sup> = 47.9%<br>7 studies | —                                                                            |
|                   |                                   | —                                                        | 567 patients                                                  | —                                                           | —                                                          | 266 patients                                                 | 1142 patients                                               | —                                                                            |
|                   |                                   | —                                                        | —                                                             | —                                                           | —                                                          | —                                                            | 16.0 (11, 21)<br><i>I</i> <sup>2</sup> = 0%<br>2 studies    | —                                                                            |
|                   |                                   | —                                                        | —                                                             | —                                                           | —                                                          | —                                                            | 193 patients                                                | —                                                                            |

The first line in each set of data is percentage prevalence (95% CI).

\*Reasons for exclusion: female only sample, limited disease durations examined; only patients using anti-tumour necrosis factor therapy treatment; only one ethnicity represented in sample.

**TABLE 4** Spearman's rank correlations between study characteristics and prevalence estimates

| Study characteristic     | No. of studies | Prevalence estimate |       |
|--------------------------|----------------|---------------------|-------|
|                          |                | $\rho$              | $P$   |
| Participation rate       | 30             | 0.21                | 0.27  |
| Sample size              | 72             | -0.07               | 0.53  |
| Overall quality          | 72             | -0.004              | 0.97  |
| Publication year         | 72             | 0.11                | 0.36  |
| Female, %                | 64             | 0.20                | 0.11  |
| Mean age                 | 60*            | -0.30*              | 0.02* |
| Mean duration of disease | 36             | 0.02                | 0.90  |

\*Significant at a  $P < 0.05$  level.

depression (such as fatigue and reduced sleep quality) may be experienced by RA patients regardless of whether depressive symptoms are present or not. For example, 7 out of the 21 BDI items assess somatic symptoms, leading to concerns about the validity of this questionnaire in medical patients [31]. Similarly, a modified version of the CESD has been suggested for use with patients with RA, due to the symptom overlap [32]; however, only two articles in the current review used the modified versions available [33, 34].

A further consideration is the representativeness of the sample from which prevalence levels are estimates. Low socio-economic status (SES) patients are often under-represented in research samples [35]. This can be problematic, as low SES is associated with increased susceptibility to depression [36] and RA [37]. Many of the studies included in this review did not measure SES appropriately, with most studies using a single measure of education level or monthly income to indicate SES. This level of heterogeneity makes it difficult to establish the representativeness of the samples included with regard to SES. However, it is possible that a selection bias favouring high SES patients exists and the results of this systematic review may therefore underestimate the prevalence of depression.

The meaning of depression in the context of RA is not straightforward. Emotional responses to a physical illness characterized by pain and debility are understandable, and somatic symptoms of depression (e.g. loss of appetite and poor sleep) might be expected as part of RA. Therefore there is a need to ensure that measures of depression used in clinical practice are validated, both against a recognized criterion (e.g. the 'gold standard' clinical interviews) and also in terms of predictive validity (i.e. to determine the impact of depression on RA outcomes). Psychometric approaches utilizing longitudinal data may further be able to distinguish subtypes of depressive symptoms and thereby distinguish symptoms that are most likely to be core to the depressive syndrome.

Ultimately the key question is whether improved patient outcomes can be attained by recognizing and managing depression more effectively. There is growing evidence that incorporating a system of collaborative and stepped care of depression in patients with physical illness, which might include routine screening for depression with referral for highly structured manualized therapies depending on the outcome of screening, is effective treatment [38]. The high prevalence of depression in RA suggests that this would be a suitable patient group in which to test such strategies.

#### Rheumatology key messages

- Depression is highly prevalent in RA patient groups.
- Increased depression prevalence in RA is significantly associated with low mean age.

## Acknowledgements

We thank Dr William Lee for his statistical advice and Dr Katherine Beck for her assistance with data extraction. F.M., L.R. and M.H. receive salary support from the National Institute for Health Research (NIHR) Mental Health Biomedical Research Centre at South London and Maudsley NHS Foundation Trust and King's College London. The views expressed are those of the authors and not necessarily those of the NHS, the NIHR or the Department of Health.

**Funding:** This work was performed on behalf of the IMPARTS Project: Integrating Mental and Physical Healthcare: Research, Training and Services. IMPARTS is funded by King's Health Partners Academic Health Science Centre, with the overall aim to improve integration of mental and physical healthcare in general hospital settings.

**Disclosure statement:** The authors have declared no conflicts of interest.

## Supplementary data

Supplementary data are available at *Rheumatology* Online.

## References

- 1 Waraich P, Goldner EM, Somers JM *et al.* Prevalence and incidence studies of mood disorders: a systematic review of the literature. *Can J Psychiatry* 2004;49:124-38.
- 2 Atal SA, Ceceli E, Okumu M *et al.* The evaluation of pain in patients with rheumatoid arthritis. *Pain Pract* 2009;9:31.
- 3 van Hoogmoed D, Fransen J, Bleijenberg G *et al.* Physical and psychosocial correlates of severe fatigue in rheumatoid arthritis. *Rheumatology* 2010;49:1294-302.
- 4 Mikuls T, Saag K, Criswell L *et al.* Health related quality of life in women with elderly onset rheumatoid arthritis. *J Rheumatol* 2003;30:952-7.

- 5 El-Miedany YM, El Rasheed AH. Is anxiety a more common disorder than depression in rheumatoid arthritis? *Joint Bone Spine* 2002;69:300–6.
- 6 Joyce AT, Smith P, Khandker R *et al.* Hidden cost of rheumatoid arthritis (RA): estimating cost of comorbid cardiovascular disease and depression among patients with RA. *J Rheumatol* 2009;36:743–52.
- 7 Spicer JG. Health-related quality of life: covariance structural equation modeling in the evaluation of symptom status and support in persons with rheumatoid arthritis. PhD thesis, University of California, San Francisco 1998:147.
- 8 Katz PP, Yelin EH. Prevalence and correlates of depressive symptoms among persons with rheumatoid arthritis. *J Rheumatol* 1993;20:790–6.
- 9 Ang DC, Choi H, Kroenke K *et al.* Comorbid depression is an independent risk factor for mortality in patients with rheumatoid arthritis. *J Rheumatol* 2005;32:1013–9.
- 10 Lok EYC, Mok CC, Cheng CW *et al.* Prevalence and determinants of psychiatric disorders in patients with rheumatoid arthritis. *Psychosomatics* 2010;51:338–38.e8.
- 11 Isik A, Koca SS, Ozturk A *et al.* Anxiety and depression in patients with rheumatoid arthritis. *Clin Rheumatol* 2007;26:872–8.
- 12 Geisser ME, Roth RS, Robinson ME. Assessing depression among persons with chronic pain using the Center for Epidemiological Studies Depression Scale and the Beck Depression Inventory: a comparative analysis. *Clin J Pain* 1997;13:163–70.
- 13 Covic T, Pallant JF, Tennant A *et al.* Variability in depression prevalence in early rheumatoid arthritis: a comparison of the CES-D and HAD-D Scales. *BMC Musculoskelet Disord* 2009;10:18.
- 14 Diagnostic and statistical manual of mental disorders. 4th edn (DSM-IV). Washington, DC: American Psychiatric Association, 1994.
- 15 ICD-10 classification of mental and behavioural disorders. Diagnostic criteria for research. 10th revision (ICD-10). Geneva: World Health Organisation, 1993.
- 16 Hotopf M, Chidgey J, Addington-Hall J *et al.* Depression in advanced disease: a systematic review. Part 1. Prevalence and case finding. *Palliat Med* 2002;16:81–97.
- 17 Spitzer R, Kroenke K, Williams JB. Validation and utility of a self-report version of PRIME-MD: the PHQ primary care study. *JAMA* 1999;282:1737–44.
- 18 Knudsen AK, Hotopf M, Skogen JC *et al.* The health status of nonparticipants in a population-based health study. *Am J Epidemiol* 2010;172:1306–14.
- 19 Barlow JH, Cullen LA, Rowe IF. Comparison of knowledge and psychological well-being between patients with a short disease duration (<=1 year) and patients with more established rheumatoid arthritis (>=10 years duration). *Patient Educ Couns* 1999;38:195–203.
- 20 Hider SL, Tanveer W, Brownfield A *et al.* Depression in RA patients treated with anti-TNF is common and under-recognized in the rheumatology clinic. *Rheumatology* 2009;48:1152–4.
- 21 Dickens C, McGowan L, Clark-Carter D *et al.* Depression in rheumatoid arthritis: a systematic review of the literature with meta-analysis. *Psychosom Med* 2002;64:52–60.
- 22 Moher D, Liberati A, Tetzlaff J *et al.* The PRISMA Group. Preferred reporting items for systematic reviews and meta-analyses: the PRISMA statement. *PLoS Med* 2009;6:2:1006–12.
- 23 Higgins JPT, Thompson SG, Deeks JJ *et al.* Measuring inconsistency in meta-analyses. *BMJ* 2003;327:557–60.
- 24 Barnard KD, Skinner TC, Peveler R. The prevalence of comorbid depression in adults with Type 1 diabetes: systematic literature review. *Diabet Med* 2006;23:445–8.
- 25 Reijnder JSAM, Ehart U, Weber WEJ *et al.* A systematic review of prevalence studies of depression in Parkinson's disease. *Mov Dis* 2008;23:183–9.
- 26 Mitchell AJ, Chan M, Bhatti H *et al.* Prevalence of depression, anxiety, and adjustment disorder in oncological, haematological, and palliative-care settings: a meta-analysis of 94 interview-based studies. *Lancet Oncol* 2011;12:160–74.
- 27 Gabriel SE. The epidemiology of rheumatoid arthritis. *Rheum Dis Clin North Am* 2001;27:269–81.
- 28 Piccinelli M, Wilkinson G. Gender differences in depression. *Br J Psychiatry* 2000;177:486–92.
- 29 Blazer D, Burchett B, Service C *et al.* The association of age and depression among the elderly: an epidemiologic exploration. *J Gerontol* 1991;46:M210–5.
- 30 Wasteson E, Brenne E, Higginson IJ *et al.* Depression assessment and classification in palliative care patients: a systematic literature review. *Palliat Med* 2009;23:739–53.
- 31 Moran PJ, Mohr DC. The validity of the Beck Depression Inventory and Hamilton Rating Scale for Depression items in the assessment of depression among patients with multiple sclerosis. *J Behav Med* 2005;28:35–41.
- 32 Martens MP, Parker JC, Smarr KL *et al.* Assessment of depression in rheumatoid arthritis: a modified version of the Center for Epidemiological Studies Depression Scale. *Arthritis Rheum* 2003;49:549–55.
- 33 Goodenow C, Reisine ST, Grady KE. Quality of social support and associated social and psychological functioning in women with rheumatoid arthritis. *Health Psychol* 1990;9:266–84.
- 34 Wilkins KE. A psychosocial model for the impact of rheumatoid arthritis on well-being. *Diss Abstr Int* 2000;61:384.
- 35 Farmer DF, Jackson SA, Camacho F *et al.* Attitudes of African American and low socioeconomic status white women toward medical research. *J Health Care Poor Underserved* 2007;18:85–99.
- 36 Miech RA, Caspi A, Moffitt TE *et al.* Low socioeconomic status and mental disorders: a longitudinal study of selection and causation during young adulthood. *Am J Sociol* 1999;104:1096–131.
- 37 Bengtsson C, Nordmark B, Klareskog L *et al.* Socioeconomic status and the risk of developing rheumatoid arthritis: results from the Swedish EIRA study. *Ann Rheum Dis* 2005;64:1588–94.
- 38 Katon WJ, von Korff M, Lin EB *et al.* The pathways study: a randomized trial of collaborative care in patients with diabetes and depression. *Arch Gen Psychiatry* 2004;61:1042–9.
